# Supplementary material
Source: MDPI journal article supplement (https://www.mdpi.com/2312-7481/7/5/73)

# checkCIF/PLATON report

You have not supplied any structure factors. As a result the full set of tests cannot be run.

THIS REPORT IS FOR GUIDANCE ONLY. IF USED AS PART OF A REVIEW PROCEDURE FOR PUBLICATION, IT SHOULD NOT REPLACE THE EXPERTISE OF AN EXPERIENCED CRYSTALLOGRAPHIC REFEREE.

No syntax errors found.      CIF dictionary      Interpreting this report

## Datablock: 1

---

Bond precision:    C-C = 0.0063 Å

Wavelength=0.71073

Cell:                a=13.4647(13)                b=16.7473(18)                c=18.793(2)  
                      alpha=109.221(2)                beta=96.022(2)                gamma=98.901(2)  
Temperature:        113 K

|                | Calculated                                  | Reported                 |
|----------------|---------------------------------------------|--------------------------|
| Volume         | 3897.8(7)                                   | 3897.9(7)                |
| Space group    | P -1                                        | P -1                     |
| Hall group     | -P 1                                        | -P 1                     |
| Moiety formula | C118 H70 Cu7 F84 N10 O36,<br>3(C0.50 H1.50) | C120 H76 Cu7 F84 N10 O36 |
| Sum formula    | C120 H76 Cu7 F84 N10 O36                    | C120 H76 Cu7 F84 N10 O36 |
| Mr             | 4274.76                                     | 4274.76                  |
| Dx,g cm-3      | 1.821                                       | 1.821                    |
| Z              | 1                                           | 1                        |
| Mu (mm-1)      | 1.113                                       | 1.113                    |
| F000           | 2113.0                                      | 2113.0                   |
| F000'          | 2117.21                                     |                          |
| h,k,lmax       | 16,19,22                                    | 16,19,22                 |
| Nref           | 13715                                       | 13415                    |
| Tmin,Tmax      | 0.800,0.837                                 | 0.800,0.837              |
| Tmin'          | 0.800                                       |                          |

Correction method= # Reported T Limits: Tmin=0.800 Tmax=0.837

AbsCorr = MULTI-SCAN

Data completeness= 0.978

Theta(max)= 25.000

R(reflections)= 0.0497( 10282)

wR2(reflections)= 0.1512( 13415)

S = 0.984

Npar= 1210

---

The following ALERTS were generated. Each ALERT has the format

**test-name\_ALERT\_alert-type\_alert-level.**

Click on the hyperlinks for more details of the test.

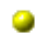

### Alert level C

|                   |                                               |                             |       |        |
|-------------------|-----------------------------------------------|-----------------------------|-------|--------|
| PLAT029_ALERT_3_C | _diffn_measured_fraction_theta_full           | value Low                   | 0.978 | Why?   |
| PLAT213_ALERT_2_C | Atom C20                                      | has ADP max/min Ratio ..... | 3.9   | prolat |
| PLAT215_ALERT_3_C | Disordered C27                                | has ADP max/min Ratio ..... | 3.3   | Note   |
| PLAT220_ALERT_2_C | NonSolvent Resd 1 C                           | Ueq(max)/Ueq(min) Range     | 5.8   | Ratio  |
| PLAT220_ALERT_2_C | NonSolvent Resd 1 F                           | Ueq(max)/Ueq(min) Range     | 4.9   | Ratio  |
| PLAT222_ALERT_3_C | NonSolvent Resd 1 H                           | Uiso(max)/Uiso(min) Range   | 6.7   | Ratio  |
| PLAT242_ALERT_2_C | Low 'MainMol' Ueq as Compared to Neighbors of | C55                         | Check |        |
| PLAT341_ALERT_3_C | Low Bond Precision on C-C Bonds .....         | 0.00631                     | Ang.  |        |

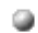

### Alert level G

|                   |                                                  |                |        |       |
|-------------------|--------------------------------------------------|----------------|--------|-------|
| PLAT002_ALERT_2_G | Number of Distance or Angle Restraints on AtSite | 11             | Note   |       |
| PLAT003_ALERT_2_G | Number of Uiso or Uij Restrained non-H Atoms ... | 13             | Report |       |
| PLAT004_ALERT_5_G | Polymeric Structure Found with Maximum Dimension | 2              | Info   |       |
| PLAT042_ALERT_1_G | Calc. and Reported Moiety Formula Strings Differ | Please         | Check  |       |
| PLAT066_ALERT_1_G | Predicted and Reported Tmin&Tmax Range Identical | ?              | Check  |       |
| PLAT154_ALERT_1_G | The s.u.'s on the Cell Angles are Equal ..(Note) | 0.002          | Degree |       |
| PLAT172_ALERT_4_G | The CIF-Embedded .res File Contains DFIX Records | 12             | Report |       |
| PLAT186_ALERT_4_G | The CIF-Embedded .res File Contains ISOR Records | 9              | Report |       |
| PLAT242_ALERT_2_G | Low 'MainMol' Ueq as Compared to Neighbors of    | C29            | Check  |       |
| PLAT242_ALERT_2_G | Low 'MainMol' Ueq as Compared to Neighbors of    | C33            | Check  |       |
| PLAT242_ALERT_2_G | Low 'MainMol' Ueq as Compared to Neighbors of    | C34            | Check  |       |
| PLAT242_ALERT_2_G | Low 'MainMol' Ueq as Compared to Neighbors of    | C38            | Check  |       |
| PLAT242_ALERT_2_G | Low 'MainMol' Ueq as Compared to Neighbors of    | C39            | Check  |       |
| PLAT242_ALERT_2_G | Low 'MainMol' Ueq as Compared to Neighbors of    | C43            | Check  |       |
| PLAT242_ALERT_2_G | Low 'MainMol' Ueq as Compared to Neighbors of    | C44            | Check  |       |
| PLAT242_ALERT_2_G | Low 'MainMol' Ueq as Compared to Neighbors of    | C48            | Check  |       |
| PLAT242_ALERT_2_G | Low 'MainMol' Ueq as Compared to Neighbors of    | C49            | Check  |       |
| PLAT242_ALERT_2_G | Low 'MainMol' Ueq as Compared to Neighbors of    | C53            | Check  |       |
| PLAT242_ALERT_2_G | Low 'MainMol' Ueq as Compared to Neighbors of    | C58            | Check  |       |
| PLAT242_ALERT_2_G | Low 'MainMol' Ueq as Compared to Neighbors of    | C59            | Check  |       |
| PLAT242_ALERT_2_G | Low 'MainMol' Ueq as Compared to Neighbors of    | C60            | Check  |       |
| PLAT300_ALERT_4_G | Atom Site Occupancy of C22                       | Constrained at | 0.5    | Check |
| PLAT300_ALERT_4_G | Atom Site Occupancy of C23                       | Constrained at | 0.5    | Check |
| PLAT300_ALERT_4_G | Atom Site Occupancy of C24                       | Constrained at | 0.5    | Check |
| PLAT300_ALERT_4_G | Atom Site Occupancy of C27                       | Constrained at | 0.5    | Check |
| PLAT300_ALERT_4_G | Atom Site Occupancy of H22A                      | Constrained at | 0.5    | Check |
| PLAT300_ALERT_4_G | Atom Site Occupancy of H22B                      | Constrained at | 0.5    | Check |
| PLAT300_ALERT_4_G | Atom Site Occupancy of H22C                      | Constrained at | 0.5    | Check |
| PLAT300_ALERT_4_G | Atom Site Occupancy of H23A                      | Constrained at | 0.5    | Check |
| PLAT300_ALERT_4_G | Atom Site Occupancy of H23B                      | Constrained at | 0.5    | Check |
| PLAT300_ALERT_4_G | Atom Site Occupancy of H23C                      | Constrained at | 0.5    | Check |
| PLAT300_ALERT_4_G | Atom Site Occupancy of H24A                      | Constrained at | 0.5    | Check |
| PLAT300_ALERT_4_G | Atom Site Occupancy of H24B                      | Constrained at | 0.5    | Check |
| PLAT300_ALERT_4_G | Atom Site Occupancy of H24C                      | Constrained at | 0.5    | Check |
| PLAT300_ALERT_4_G | Atom Site Occupancy of H27A                      | Constrained at | 0.5    | Check |
| PLAT300_ALERT_4_G | Atom Site Occupancy of H27B                      | Constrained at | 0.5    | Check |
| PLAT300_ALERT_4_G | Atom Site Occupancy of H27C                      | Constrained at | 0.5    | Check |
| PLAT300_ALERT_4_G | Atom Site Occupancy of C25                       | Constrained at | 0.5    | Check |
| PLAT300_ALERT_4_G | Atom Site Occupancy of H25A                      | Constrained at | 0.5    | Check |
| PLAT300_ALERT_4_G | Atom Site Occupancy of H25B                      | Constrained at | 0.5    | Check |
| PLAT300_ALERT_4_G | Atom Site Occupancy of H25C                      | Constrained at | 0.5    | Check |
| PLAT300_ALERT_4_G | Atom Site Occupancy of C26                       | Constrained at | 0.5    | Check |
| PLAT300_ALERT_4_G | Atom Site Occupancy of H26A                      | Constrained at | 0.5    | Check |
| PLAT300_ALERT_4_G | Atom Site Occupancy of H26B                      | Constrained at | 0.5    | Check |

|                   |                                                  |                |       |              |
|-------------------|--------------------------------------------------|----------------|-------|--------------|
| PLAT300_ALERT_4_G | Atom Site Occupancy of H26C                      | Constrained at | 0.5   | Check        |
| PLAT301_ALERT_3_G | Main Residue Disorder .....                      | (Resd 1 )      | 2%    | Note         |
| PLAT302_ALERT_4_G | Anion/Solvent/Minor-Residue Disorder             | (Resd 2 )      | 100%  | Note         |
| PLAT302_ALERT_4_G | Anion/Solvent/Minor-Residue Disorder             | (Resd 3 )      | 100%  | Note         |
| PLAT412_ALERT_2_G | Short Intra XH3 .. XHn                           | H27B ..H28A .  | 1.83  | Ang.         |
|                   |                                                  | x,y,z =        | 1_555 | Check        |
| PLAT412_ALERT_2_G | Short Intra XH3 .. XHn                           | H27C ..H28A .  | 1.81  | Ang.         |
|                   |                                                  | x,y,z =        | 1_555 | Check        |
| PLAT413_ALERT_2_G | Short Inter XH3 .. XHn                           | H26A ..H28B .  | 2.00  | Ang.         |
|                   |                                                  | x,y,z =        | 1_555 | Check        |
| PLAT413_ALERT_2_G | Short Inter XH3 .. XHn                           | H26A ..H28C .  | 1.86  | Ang.         |
|                   |                                                  | x,y,z =        | 1_555 | Check        |
| PLAT413_ALERT_2_G | Short Inter XH3 .. XHn                           | H26B ..H28B .  | 2.00  | Ang.         |
|                   |                                                  | x,y,z =        | 1_555 | Check        |
| PLAT432_ALERT_2_G | Short Inter X...Y Contact                        | N4 ..C26       | 2.45  | Ang.         |
|                   |                                                  | x,y,z =        | 1_555 | Check        |
| PLAT432_ALERT_2_G | Short Inter X...Y Contact                        | N5 ..C25       | 2.44  | Ang.         |
|                   |                                                  | x,y,z =        | 1_555 | Check        |
| PLAT432_ALERT_2_G | Short Inter X...Y Contact                        | N5 ..C26       | 2.93  | Ang.         |
|                   |                                                  | x,y,z =        | 1_555 | Check        |
| PLAT432_ALERT_2_G | Short Inter X...Y Contact                        | C19 ..C26      | 3.00  | Ang.         |
|                   |                                                  | x,y,z =        | 1_555 | Check        |
| PLAT432_ALERT_2_G | Short Inter X...Y Contact                        | C19 ..C25      | 3.18  | Ang.         |
|                   |                                                  | x,y,z =        | 1_555 | Check        |
| PLAT432_ALERT_2_G | Short Inter X...Y Contact                        | C20 ..C26      | 1.83  | Ang.         |
|                   |                                                  | x,y,z =        | 1_555 | Check        |
| PLAT432_ALERT_2_G | Short Inter X...Y Contact                        | C20 ..C25      | 2.35  | Ang.         |
|                   |                                                  | x,y,z =        | 1_555 | Check        |
| PLAT432_ALERT_2_G | Short Inter X...Y Contact                        | C21 ..C25      | 1.80  | Ang.         |
|                   |                                                  | x,y,z =        | 1_555 | Check        |
| PLAT432_ALERT_2_G | Short Inter X...Y Contact                        | C21 ..C26      | 2.21  | Ang.         |
|                   |                                                  | x,y,z =        | 1_555 | Check        |
| PLAT432_ALERT_2_G | Short Inter X...Y Contact                        | C26 ..C28      | 2.14  | Ang.         |
|                   |                                                  | x,y,z =        | 1_555 | Check        |
| PLAT773_ALERT_2_G | Check long C-C Bond in CIF: C20                  | --C27          | 1.75  | Ang.         |
| PLAT773_ALERT_2_G | Check long C-C Bond in CIF: C20                  | --C26          | 1.84  | Ang.         |
| PLAT773_ALERT_2_G | Check long C-C Bond in CIF: C21                  | --C25          | 1.80  | Ang.         |
| PLAT794_ALERT_5_G | Tentative Bond Valency for Cu1                   | (II) .         | 2.23  | Info         |
| PLAT794_ALERT_5_G | Tentative Bond Valency for Cu2                   | (II) .         | 2.15  | Info         |
| PLAT794_ALERT_5_G | Tentative Bond Valency for Cu3                   | (II) .         | 2.25  | Info         |
| PLAT860_ALERT_3_G | Number of Least-Squares Restraints .....         |                | 90    | Note         |
| PLAT883_ALERT_1_G | No Info/Value for _atom_sites_solution_primary . |                |       | Please Do !  |
| PLAT941_ALERT_3_G | Average HKL Measurement Multiplicity .....       |                | 2.7   | Low          |
| PLAT965_ALERT_2_G | The SHELXL WEIGHT Optimisation has not Converged |                |       | Please Check |

---

0 **ALERT level A** = Most likely a serious problem - resolve or explain  
 0 **ALERT level B** = A potentially serious problem, consider carefully  
 8 **ALERT level C** = Check. Ensure it is not caused by an omission or oversight  
 73 **ALERT level G** = General information/check it is not something unexpected

4 **ALERT type 1** CIF construction/syntax error, inconsistent or missing data  
 38 **ALERT type 2** Indicator that the structure model may be wrong or deficient  
 7 **ALERT type 3** Indicator that the structure quality may be low  
 28 **ALERT type 4** Improvement, methodology, query or suggestion  
 4 **ALERT type 5** Informative message, check

---

It is advisable to attempt to resolve as many as possible of the alerts in all categories. Often the minor alerts point to easily fixed oversights, errors and omissions in your CIF or refinement strategy, so attention to these fine details can be worthwhile. In order to resolve some of the more serious problems it may be necessary to carry out additional measurements or structure refinements. However, the purpose of your study may justify the reported deviations and the more serious of these should normally be commented upon in the discussion or experimental section of a paper or in the "special\_details" fields of the CIF. checkCIF was carefully designed to identify outliers and unusual parameters, but every test has its limitations and alerts that are not important in a particular case may appear. Conversely, the absence of alerts does not guarantee there are no aspects of the results needing attention. It is up to the individual to critically assess their own results and, if necessary, seek expert advice.

### **Publication of your CIF in IUCr journals**

A basic structural check has been run on your CIF. These basic checks will be run on all CIFs submitted for publication in IUCr journals (*Acta Crystallographica*, *Journal of Applied Crystallography*, *Journal of Synchrotron Radiation*); however, if you intend to submit to *Acta Crystallographica Section C* or *E* or *IUCrData*, you should make sure that full publication checks are run on the final version of your CIF prior to submission.

### **Publication of your CIF in other journals**

Please refer to the *Notes for Authors* of the relevant journal for any special instructions relating to CIF submission.

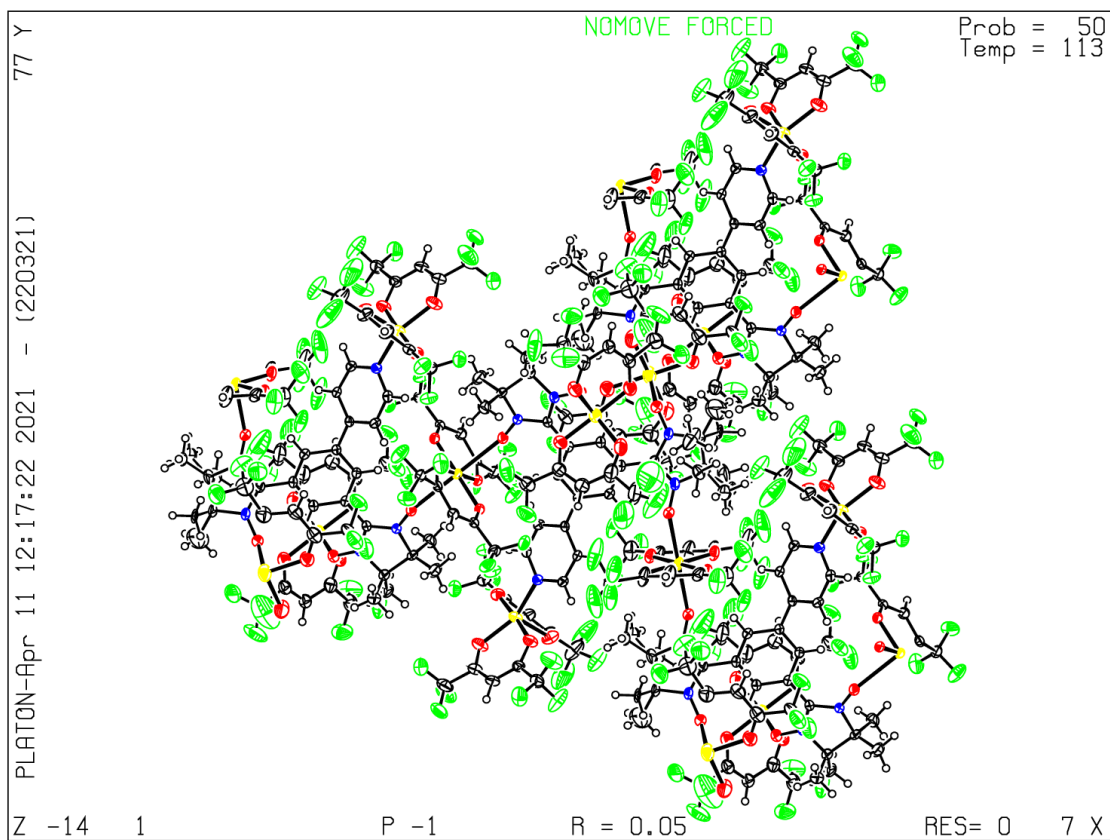

Supplement: s1 [file s1]
