# Supplementary material
Source: MDPI journal article supplement (https://www.mdpi.com/2312-7481/7/5/73)

# checkCIF/PLATON report

You have not supplied any structure factors. As a result the full set of tests cannot be run.

THIS REPORT IS FOR GUIDANCE ONLY. IF USED AS PART OF A REVIEW PROCEDURE FOR PUBLICATION, IT SHOULD NOT REPLACE THE EXPERTISE OF AN EXPERIENCED CRYSTALLOGRAPHIC REFEREE.

No syntax errors found.      CIF dictionary      Interpreting this report

## Datablock: 2

---

|                        |                                    |                                   |
|------------------------|------------------------------------|-----------------------------------|
| Bond precision:        | C-C = 0.0129 Å                     | Wavelength=0.71073                |
| Cell:                  | a=11.172(2)                        | b=15.205(3)      c=15.890(3)      |
|                        | alpha=78.94(3)                     | beta=85.98(3)      gamma=70.21(3) |
| Temperature:           | 113 K                              |                                   |
|                        | Calculated                         | Reported                          |
| Volume                 | 2492.6(10)                         | 2492.6(10)                        |
| Space group            | P -1                               | P -1                              |
| Hall group             | -P 1                               | -P 1                              |
| Moiety formula         | C37 H23 Cu2 F24 N4 O10 [+ solvent] | C37 H23 Cu2 F24 N4 O10            |
| Sum formula            | C37 H23 Cu2 F24 N4 O10 [+ solvent] | C37 H23 Cu2 F24 N4 O10            |
| Mr                     | 1266.70                            | 1266.67                           |
| Dx, g cm <sup>-3</sup> | 1.688                              | 1.688                             |
| Z                      | 2                                  | 2                                 |
| Mu (mm <sup>-1</sup> ) | 0.998                              | 0.998                             |
| F000                   | 1254.0                             | 1254.0                            |
| F000'                  | 1256.41                            |                                   |
| h,k,lmax               | 13,18,18                           | 13,18,18                          |
| Nref                   | 8789                               | 8784                              |
| Tmin,Tmax              | 0.705,0.819                        | 0.758,1.000                       |
| Tmin'                  | 0.601                              |                                   |

Correction method= # Reported T Limits: Tmin=0.758 Tmax=1.000  
AbsCorr = MULTI-SCAN

Data completeness= 0.999      Theta(max)= 25.009

R(reflections)= 0.0927( 6655)      wR2(reflections)= 0.2363( 8784)

S = 1.007      Npar= 701

---

The following ALERTS were generated. Each ALERT has the format

**test-name\_ALERT\_alert-type\_alert-level.**

Click on the hyperlinks for more details of the test.

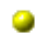

### Alert level C

ABSTY02\_ALERT\_1\_C An \_exptl\_absorpt\_correction\_type has been given without  
a literature citation. This should be contained in the  
\_exptl\_absorpt\_process\_details field.  
Absorption correction given as Multi-scan

DIFMX02\_ALERT\_1\_C The maximum difference density is > 0.1\*ZMAX\*0.75  
The relevant atom site should be identified.

PLAT094\_ALERT\_2\_C Ratio of Maximum / Minimum Residual Density .... 3.14 Report

PLAT097\_ALERT\_2\_C Large Reported Max. (Positive) Residual Density 2.62 eA-3

PLAT213\_ALERT\_2\_C Atom F11 has ADP max/min Ratio ..... 3.1 oblate

PLAT220\_ALERT\_2\_C Non-Solvent Resd 1 C Ueq(max)/Ueq(min) Range 4.0 Ratio

PLAT220\_ALERT\_2\_C Non-Solvent Resd 1 F Ueq(max)/Ueq(min) Range 3.3 Ratio

PLAT230\_ALERT\_2\_C Hirshfeld Test Diff for F9 --C27 . 5.5 s.u.

PLAT230\_ALERT\_2\_C Hirshfeld Test Diff for F10 --C24 . 5.5 s.u.

PLAT232\_ALERT\_2\_C Hirshfeld Test Diff (M-X) Cu1 --O10 . 5.7 s.u.

PLAT234\_ALERT\_4\_C Large Hirshfeld Difference F7 --C27 . 0.17 Ang.

PLAT234\_ALERT\_4\_C Large Hirshfeld Difference F11 --C24 . 0.23 Ang.

PLAT234\_ALERT\_4\_C Large Hirshfeld Difference F12 --C24 . 0.22 Ang.

PLAT234\_ALERT\_4\_C Large Hirshfeld Difference F13 --C32 . 0.19 Ang.

PLAT234\_ALERT\_4\_C Large Hirshfeld Difference F14 --C32 . 0.17 Ang.

PLAT234\_ALERT\_4\_C Large Hirshfeld Difference F17 --C29 . 0.19 Ang.

PLAT234\_ALERT\_4\_C Large Hirshfeld Difference O7 --C31 . 0.18 Ang.

PLAT241\_ALERT\_2\_C High 'MainMol' Ueq as Compared to Neighbors of 02 Check

PLAT241\_ALERT\_2\_C High 'MainMol' Ueq as Compared to Neighbors of 07 Check

PLAT341\_ALERT\_3\_C Low Bond Precision on C-C Bonds ..... 0.01287 Ang.

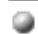

### Alert level G

PLAT003\_ALERT\_2\_G Number of Uiso or Uij Restrained non-H Atoms ... 61 Report

PLAT004\_ALERT\_5\_G Polymeric Structure Found with Maximum Dimension 2 Info

PLAT072\_ALERT\_2\_G SHELXL First Parameter in WGHT Unusually Large 0.12 Report

PLAT083\_ALERT\_2\_G SHELXL Second Parameter in WGHT Unusually Large 46.00 Why ?

PLAT154\_ALERT\_1\_G The s.u.'s on the Cell Angles are Equal ..(Note) 0.03 Degree

PLAT177\_ALERT\_4\_G The CIF-Embedded .res File Contains DELU Records 5 Report

PLAT178\_ALERT\_4\_G The CIF-Embedded .res File Contains SIMU Records 4 Report

PLAT186\_ALERT\_4\_G The CIF-Embedded .res File Contains ISOR Records 1 Report

PLAT242\_ALERT\_2\_G Low 'MainMol' Ueq as Compared to Neighbors of C19 Check

PLAT242\_ALERT\_2\_G Low 'MainMol' Ueq as Compared to Neighbors of C22 Check

PLAT242\_ALERT\_2\_G Low 'MainMol' Ueq as Compared to Neighbors of C24 Check

PLAT242\_ALERT\_2\_G Low 'MainMol' Ueq as Compared to Neighbors of C27 Check

PLAT242\_ALERT\_2\_G Low 'MainMol' Ueq as Compared to Neighbors of C29 Check

PLAT242\_ALERT\_2\_G Low 'MainMol' Ueq as Compared to Neighbors of C32 Check

PLAT242\_ALERT\_2\_G Low 'MainMol' Ueq as Compared to Neighbors of C34 Check

PLAT242\_ALERT\_2\_G Low 'MainMol' Ueq as Compared to Neighbors of C37 Check

PLAT343\_ALERT\_2\_G Unusual sp3 Angle Range in Main Residue for C24 Check

PLAT434\_ALERT\_2\_G Short Inter HL..HL Contact F1 ..F20 2.73 Ang.

-1+x,1+y,-1+z = 1\_464 Check

PLAT605\_ALERT\_4\_G Largest Solvent Accessible VOID in the Structure 184 A\*\*3

PLAT794\_ALERT\_5\_G Tentative Bond Valency for Cu1 (II) . 2.18 Info

PLAT794\_ALERT\_5\_G Tentative Bond Valency for Cu2 (II) . 2.21 Info

PLAT794\_ALERT\_5\_G Tentative Bond Valency for Cu3 (II) . 2.26 Info

PLAT860\_ALERT\_3\_G Number of Least-Squares Restraints ..... 641 Note

PLAT869\_ALERT\_4\_G ALERTS Related to the Use of SQUEEZE Suppressed ! Info

0 ALERT level A = Most likely a serious problem - resolve or explain

0 **ALERT level B** = A potentially serious problem, consider carefully  
20 **ALERT level C** = Check. Ensure it is not caused by an omission or oversight  
24 **ALERT level G** = General information/check it is not something unexpected

3 **ALERT type 1** CIF construction/syntax error, inconsistent or missing data  
23 **ALERT type 2** Indicator that the structure model may be wrong or deficient  
2 **ALERT type 3** Indicator that the structure quality may be low  
12 **ALERT type 4** Improvement, methodology, query or suggestion  
4 **ALERT type 5** Informative message, check

---

It is advisable to attempt to resolve as many as possible of the alerts in all categories. Often the minor alerts point to easily fixed oversights, errors and omissions in your CIF or refinement strategy, so attention to these fine details can be worthwhile. In order to resolve some of the more serious problems it may be necessary to carry out additional measurements or structure refinements. However, the purpose of your study may justify the reported deviations and the more serious of these should normally be commented upon in the discussion or experimental section of a paper or in the "special\_details" fields of the CIF. checkCIF was carefully designed to identify outliers and unusual parameters, but every test has its limitations and alerts that are not important in a particular case may appear. Conversely, the absence of alerts does not guarantee there are no aspects of the results needing attention. It is up to the individual to critically assess their own results and, if necessary, seek expert advice.

### **Publication of your CIF in IUCr journals**

A basic structural check has been run on your CIF. These basic checks will be run on all CIFs submitted for publication in IUCr journals (*Acta Crystallographica*, *Journal of Applied Crystallography*, *Journal of Synchrotron Radiation*); however, if you intend to submit to *Acta Crystallographica Section C* or *E* or *IUCrData*, you should make sure that full publication checks are run on the final version of your CIF prior to submission.

### **Publication of your CIF in other journals**

Please refer to the *Notes for Authors* of the relevant journal for any special instructions relating to CIF submission.

---

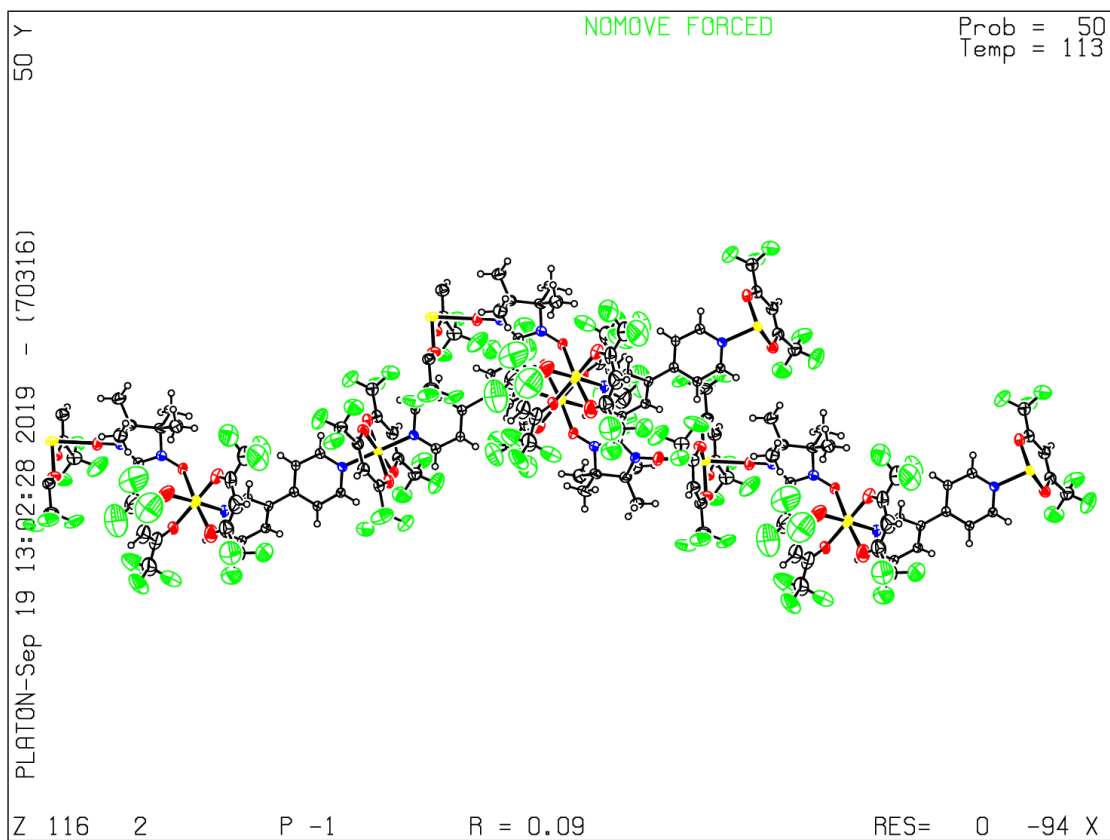

Supplement: s1 [file s1]
