# Supplementary material
Source: MDPI journal article supplement (https://www.mdpi.com/2312-7481/7/5/73)
Supplement: s1 [file s1]

# Supplementary Material: Two-Dimensional Nitronyl Nitroxide–Cu Networks Based on Multi-Dentate Nitronyl Nitroxides: Structures and Magnetic Properties

Hongdao Li <sup>1,2,\*</sup>, Jiao Lu <sup>2</sup>, Jing Xie <sup>2</sup>, Pei Jing <sup>2</sup> and Licun Li <sup>2,\*</sup>

<sup>1</sup> Department of Chemistry and Chemical Engineering, Taiyuan Institute of Technology, Taiyuan 030008, China

<sup>2</sup> Department of Chemistry, Key Laboratory of Advanced Energy Materials Chemistry, College of Chemistry, Nankai University, Tianjin 300071, China; lj96111@126.com (J.L.); 13662036932@163.com (J.X.); jingpei22@163.com (P.J.)

\* Correspondence: lihong.dao@163.com (H.L.); llicun@nankai.edu.cn (L.L.)

## Table of Contents

**Table S1.** Selected bond lengths [Å] and angles [°] for complex 1.

**Table S2.** Selected bond lengths [Å] and angles [°] for complex 2.

**Table S3.** SHAPE analysis for Cu<sup>II</sup> ions in complex 1.

**Table S4.** SHAPE analysis for Cu<sup>II</sup> ions in complex 2.

**Figure S1.** The coordination polyhedron of five Cu(II) ions in complex 1.

**Figure S2.** Crystal packing arrangement for complex 1.

**Figure S3.** The coordination polyhedron of four Cu(II) ions in complex 2.

**Figure S4.** Crystal packing arrangement for complex 2.

**Scheme S1.** Spin polarization mechanism for the magnetic coupling mediated by NIT-3Py-5-4Py ligand.

**Table S1.** Selected bond lengths [Å] and angles [°] for complex 1.

| 1                   |           |                     |           |
|---------------------|-----------|---------------------|-----------|
| Cu(1)–O(1)          | 1.947(3)  | Cu(1)–O(2)          | 1.956(3)  |
| Cu(1)–O(3)          | 2.166(3)  | Cu(1)–O(4)          | 1.947(3)  |
| Cu(1)–N(1)          | 1.991(3)  | Cu(2)–O(9)          | 1.935(2)  |
| Cu(2)–O(9)#3        | 1.935(2)  | Cu(2)–O(10)         | 1.951(2)  |
| Cu(2)–O(10)#3       | 1.951(2)  | Cu(2)–O(15)         | 2.553(2)  |
| Cu(2)–O(15)#3       | 2.553(2)  | Cu(3)–O(5)          | 1.913(3)  |
| Cu(3)–O(6)          | 2.146(3)  | Cu(3)–O(7)          | 1.963(3)  |
| Cu(3)–O(8)          | 1.904(3)  | Cu(3)–O(16)         | 1.989(3)  |
| Cu(4)–O(13)         | 1.930(3)  | Cu(4)–O(13)#1       | 1.930(3)  |
| Cu(4)–O(14)         | 1.943(3)  | Cu(4)–O(14)#1       | 1.943(3)  |
| Cu(4)–O(17)         | 2.428(3)  | Cu(4)–O(17)#1       | 2.428(3)  |
| Cu(5)–O(11)         | 1.950(3)  | Cu(5)–O(11)#2       | 1.950(3)  |
| Cu(5)–O(12)         | 1.941(3)  | Cu(5)–O(12)#2       | 1.941(3)  |
| O(15)–N(2)          | 1.281(4)  | O(16)–N(3)          | 1.294(4)  |
| O(18)–N(4)          | 1.296(4)  | O(17)–N(5)          | 1.281(4)  |
| N(1)–Cu(1)–O(3)     | 101.18(1) | O(15)–Cu(2)–O(15)#3 | 180.00(1) |
| N(2)–O(15)–Cu(2)    | 149.51(2) | N(3)–O(16)–Cu(3)    | 122.8(2)  |
| N(5)–O(17)–Cu(4)    | 147.12(2) | O(17)–Cu(4)–O(17)#3 | 180.00(1) |
| O(18)–Cu(5)–O(18)#2 | 180.00(1) | N(4)–O(18)–Cu(5)    | 133.65(2) |

Symmetry transformations used to generate equivalent atoms: #1 -x+2,-y,-z; #2 -x+2,-y+1,-z; #3 -x+2,-y+1,-z+1

**Table S2.** Selected bond lengths [Å] and angles [°] for complex 2.

| 2                 |           |                 |          |
|-------------------|-----------|-----------------|----------|
| Cu(1)-O(9)        | 2.039(5)  | Cu(1)-O(9)#1    | 2.039(5) |
| Cu(1)-O(10)       | 2.229(5)  | Cu(1)-O(10)#1   | 2.229(5) |
| Cu(1)-N(1)        | 2.018(5)  | Cu(1)-N(1)#1    | 2.018(5) |
| Cu(2)-O(1)        | 2.326(5)  | Cu(2)-O(5)      | 2.002(6) |
| Cu(2)-O(6)        | 1.952(6)  | Cu(2)-O(7)      | 2.237(7) |
| Cu(2)-O(8)        | 1.945(6)  | Cu(2)-N(2)      | 2.061(6) |
| Cu(3)-O(2)        | 2.362(5)  | Cu(3)-O(2)#1    | 2.362(5) |
| Cu(3)-O(3)        | 1.947(5)  | Cu(3)-O(3)#1    | 1.947(5) |
| Cu(3)-O(4)        | 1.942(5)  | Cu(3)-O(4)#1    | 1.942(5) |
| O(1)-N(3)         | 1.278(7)  | O(2)-N(4)       | 1.270(7) |
| N(1)-Cu(1)-N(1)#1 | 180.00(1) | N(2)-Cu(2)-O(1) | 87.4(2)  |
| N(3)-O(1)-Cu(2)   | 126.0(4)  | N(4)-O(2)-Cu(3) | 150.7(5) |
| O(2)#1-Cu(3)-O(2) | 180.00(1) |                 |          |

Symmetry transformations used to generate equivalent atoms: #1 -x,-y+2,-z-1

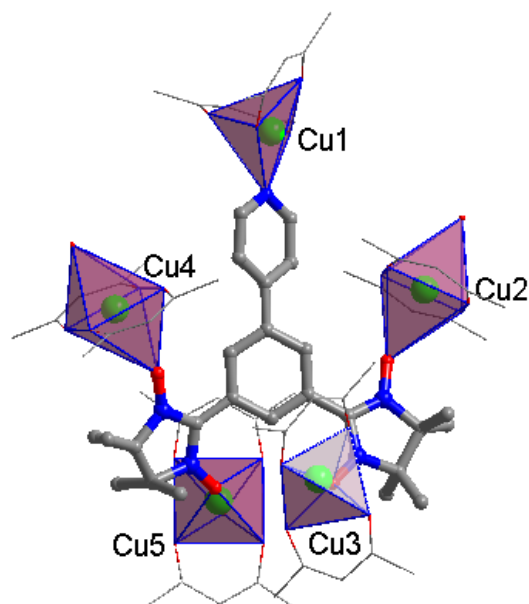

**Figure S1.** The coordination polyhedron of five Cu(II) ions in complex 1. All of the fluorine and hydrogen atoms are omitted for clarity.

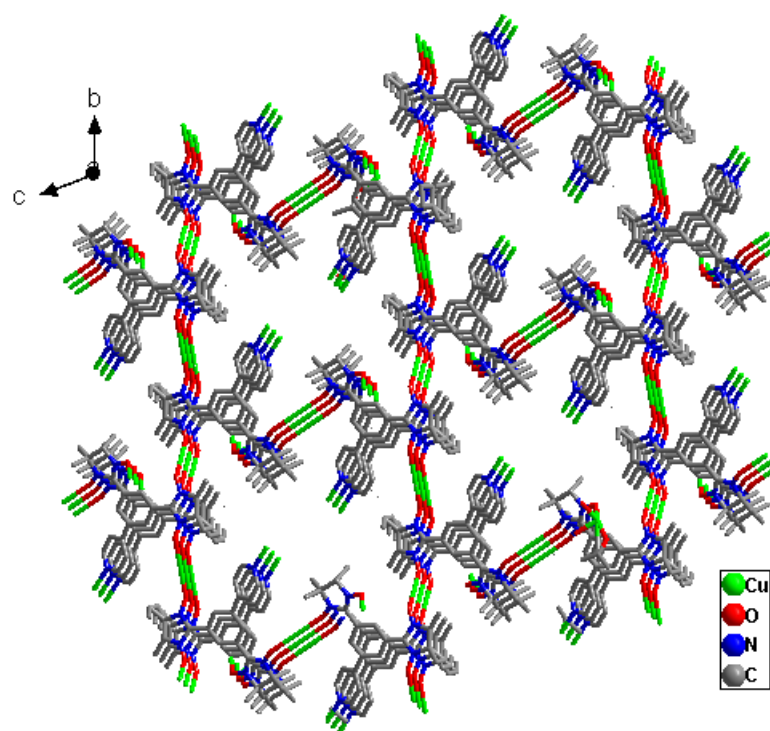

**Figure S2.** Crystal packing arrangement for complex 1. All of the hydrogen and hfac coligands are omitted for clarity.

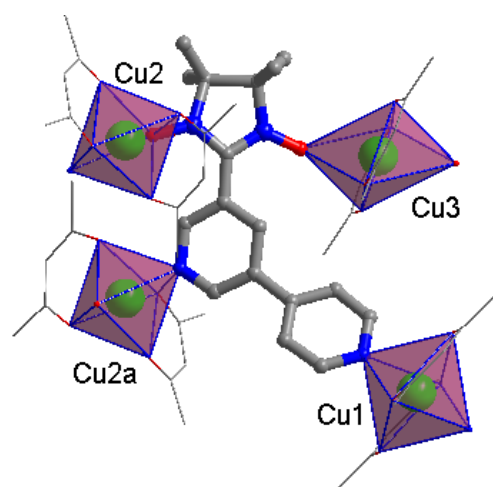

**Figure S3.** The coordination polyhedron of four Cu(II) ions in complex 2. All of the fluorine and hydrogen atoms are omitted for clarity.

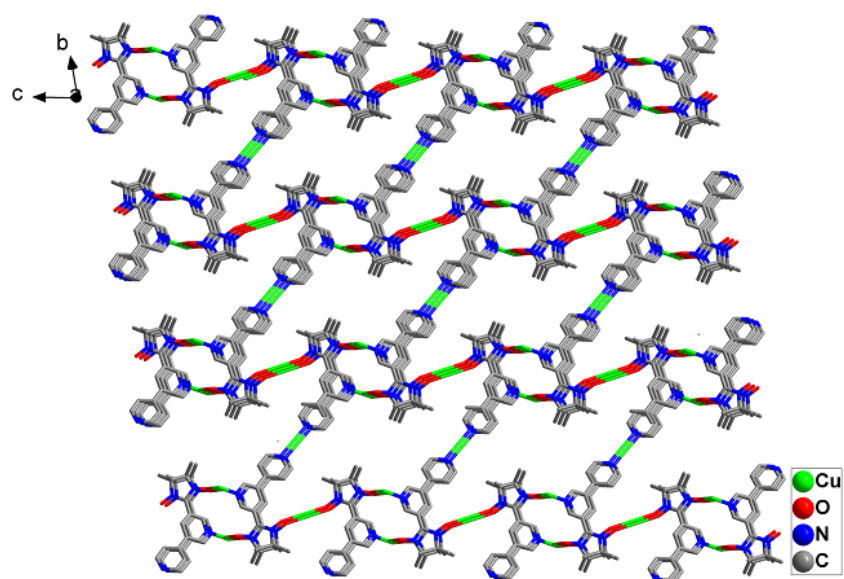

**Figure S4.** Crystal packing arrangement for complex 2. All of the hydrogen and hfac coligands are omitted for clarity.

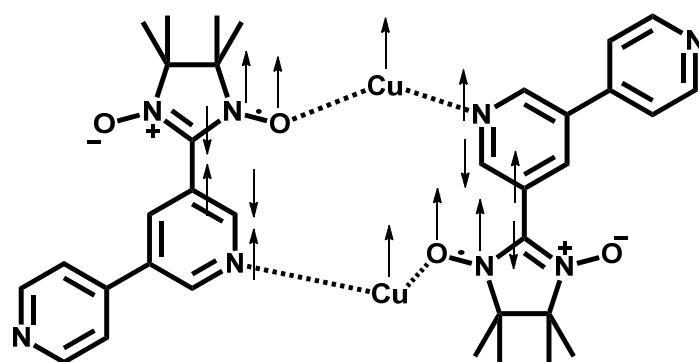

**Scheme S1.** Spin polarization mechanism for the magnetic coupling mediated by NIT-3Py-5-4Py ligand.
